# Supplementary material for: FeS encapsulated hierarchical porous S, N-dual-doped carbon for oxygen reduction reaction facilitation in Zn–air batteries
Source: Royal Society of Chemistry journal article supplement (doi:10.1039/d1se00242b), 2021-01-01
Supplement: d1se00242b1.pdf [file d1se00242b1.pdf]

# **FeS encapsulated hierarchical porous S, N-dual-doped carbon for oxygen reduction reaction facilitation in Zn-air battery**

Hao Xu,<sup>a</sup> Dan Wang,<sup>a</sup> Peixia Yang,<sup>\*a</sup> Anmin Liu,<sup>\*b</sup> Ruopeng Li,<sup>a</sup> Lihui Xiao,<sup>a</sup> Jinqiu Zhang,<sup>a</sup> Zhenshen Qu<sup>c</sup> and Maozhong An<sup>a</sup>

<sup>a</sup> MIIT Key Laboratory of Critical Materials Technology for New Energy Conversion and Storage, School of Chemistry and Chemical Engineering, Harbin Institute of Technology, Harbin, 150001 China. \*E-mail: [yangpeixia@hit.edu.cn](mailto:yangpeixia@hit.edu.cn);

<sup>b</sup> State Key Laboratory of Fine Chemicals, School of Chemical Engineering, Dalian University of Technology, Dalian, 116000 China. \*E-mail: [liuanmin@dlut.edu.cn](mailto:liuanmin@dlut.edu.cn).

<sup>c</sup> Aerospace College, Harbin Institute of Technology. Harbin, 150001 China. E-mail: [miraland@hit.edu.cn](mailto:miraland@hit.edu.cn)

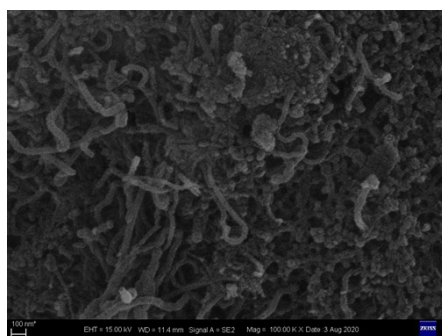

**Fig. S1** The SEM image of Fe NPs/SNC.

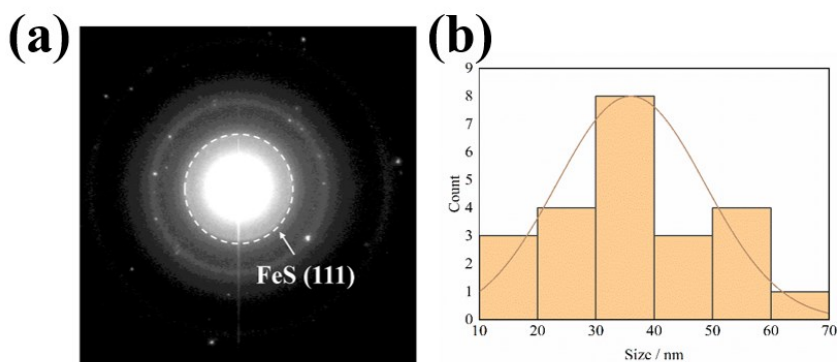

**Fig. S2** (a) The SAED pattern of Fe-S, N-C-950. (b) the size distribution of FeS nanoparticles.

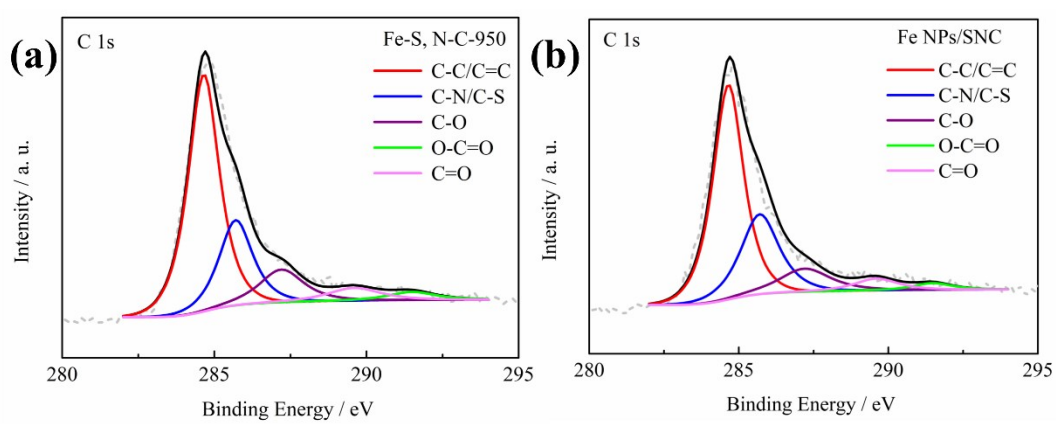

**Fig. S3** (a) High resolution spectra of C 1s of Fe-S, N-C-950. (b) High resolution spectra of C 1s of Fe NPs/SNC.

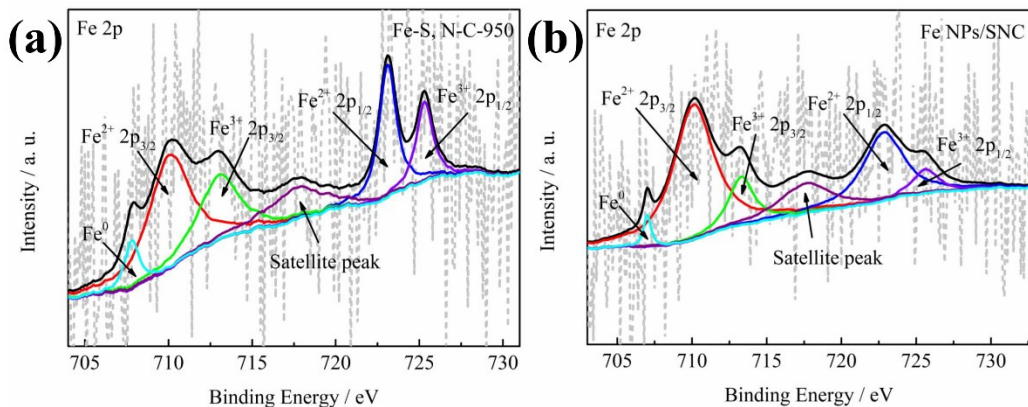

**Fig. S4** (a) High resolution spectra of Fe 2p of Fe-S, N-C-950. (b) High resolution spectra of Fe 2p of Fe NPs/SNC.

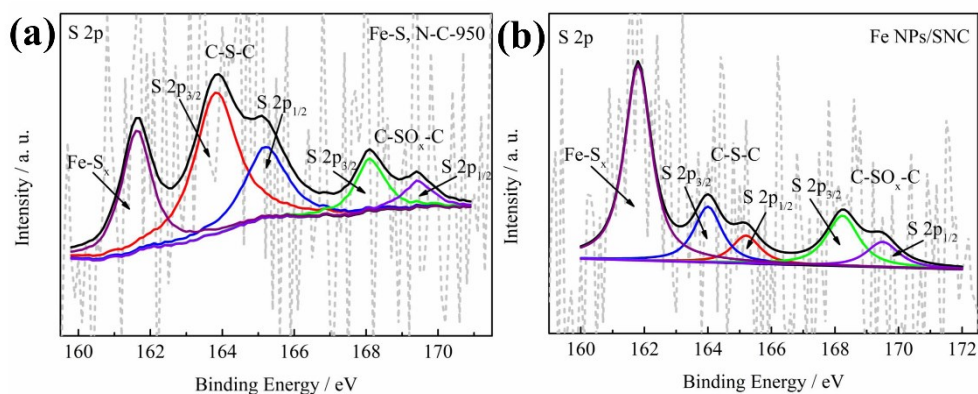

**Fig. S5** (a) High resolution spectra of S 2p of Fe-S, N-C-950. (b) High resolution spectra of S 2p of Fe NPs/SNC.

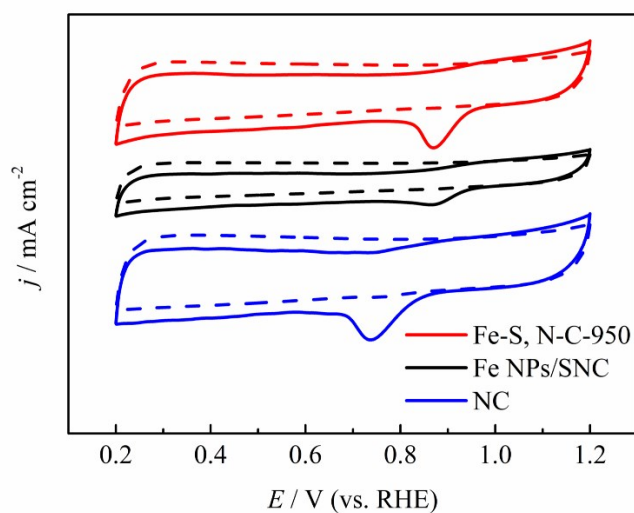

**Fig. S6** Cyclic voltammograms (CV) of the prepared catalysts at a scan rate of 50 mv s<sup>-1</sup> in 0.1 M KOH.

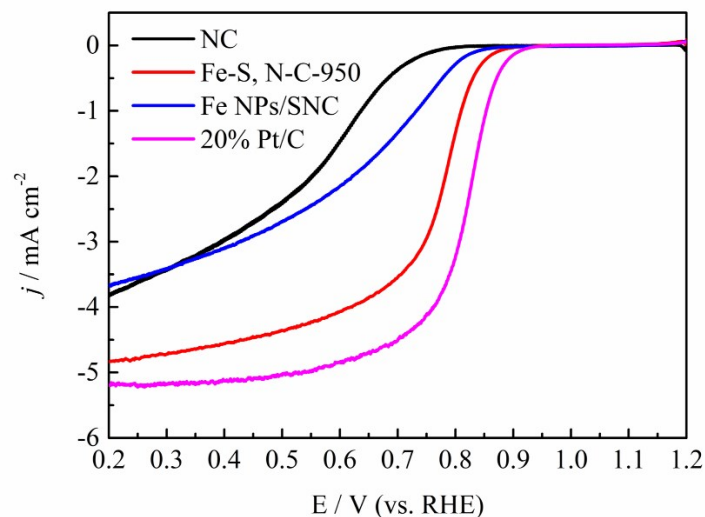

**Fig. S7** ORR polarization LSV curves of NC, Fe-S, N-C-950, Fe NPs/SNC and 20% Pt/C in 0.1 M  $\text{HClO}_4$ ; rotation rate of 1600 rpm, scan rate of  $10 \text{ mV s}^{-1}$ .

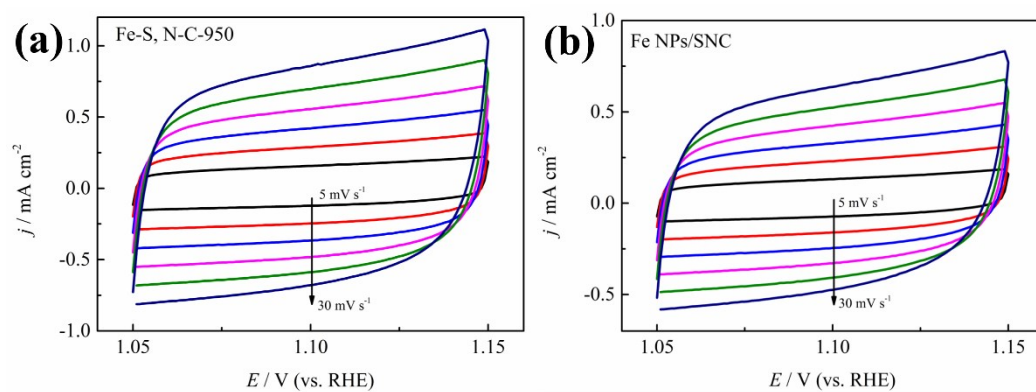

**Fig. S8** CV curves for (a) Fe-S, N-C-950 and (b) Fe NPs/SNC at various scan rates.

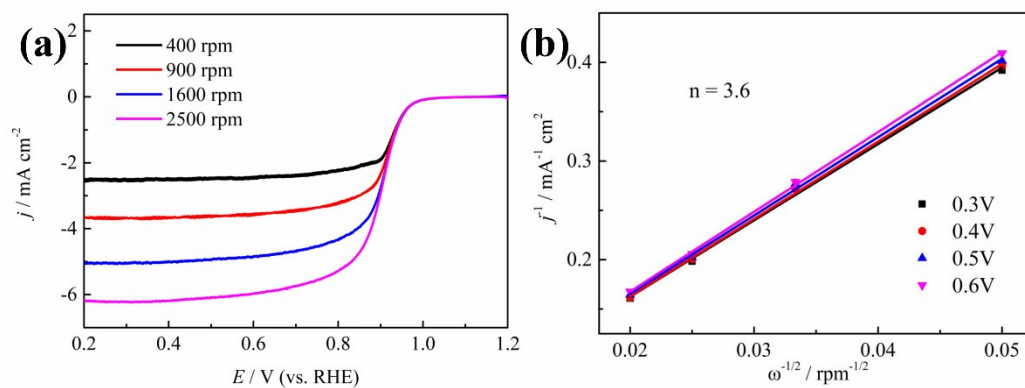

**Fig. S9** (a) LSV curves of Fe-S, N-C-950 for rotation speeds from 400 to 2500 rpm. (b) Fitted K–L plots at different potentials.

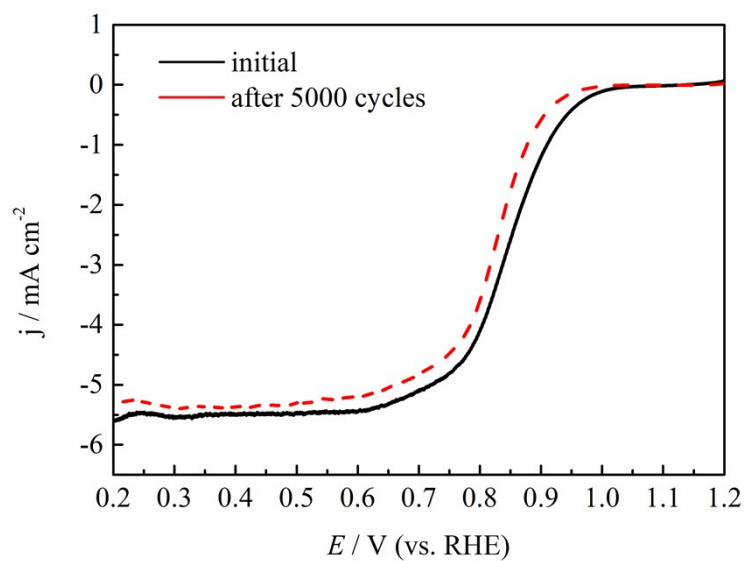

**Fig. S10** ORR polarization curves of Pt/C before and after 5000 cycles in 0.1 M KOH.

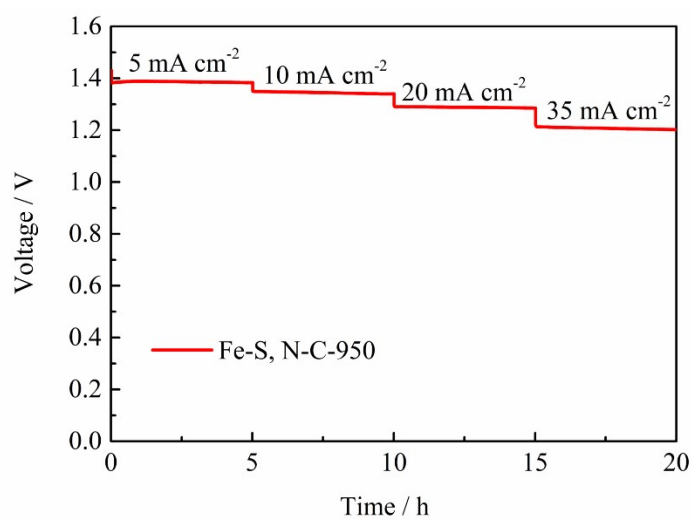

**Fig. S11.** Discharge curves of primary Zn-air batteries using Fe-S, N-C-950 as ORR catalyst.

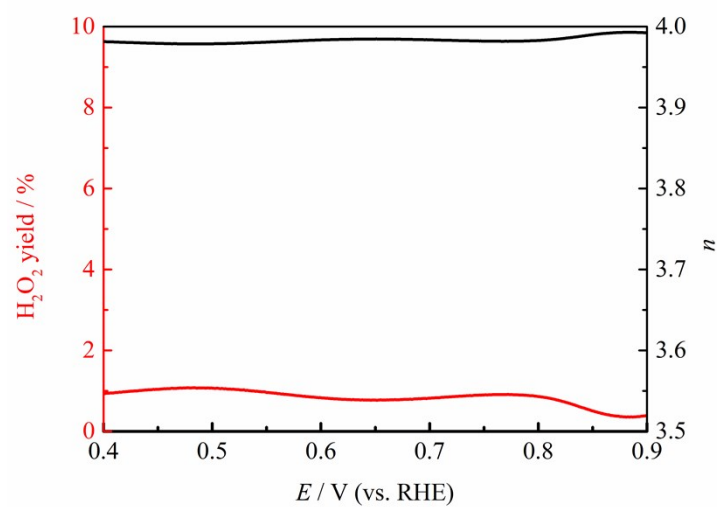

**Fig. S12**  $\text{H}_2\text{O}_2$  yield and electron transfer number ( $n$ ) for 20% Pt/C.

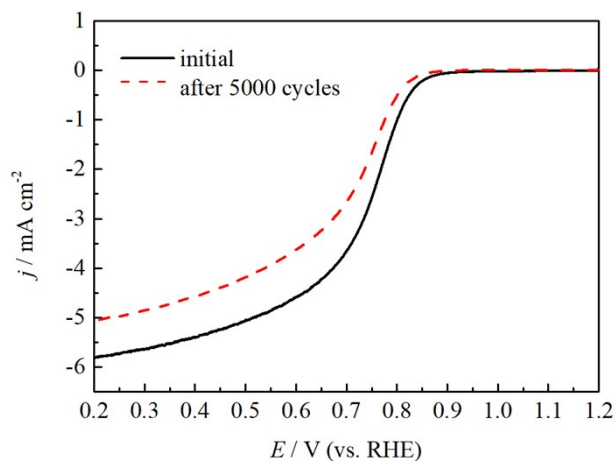

**Fig. S13** ORR polarization curves of Fe-S, N-C-950 before and after 5000 cycles in 0.1 M  $\text{HClO}_4$ .

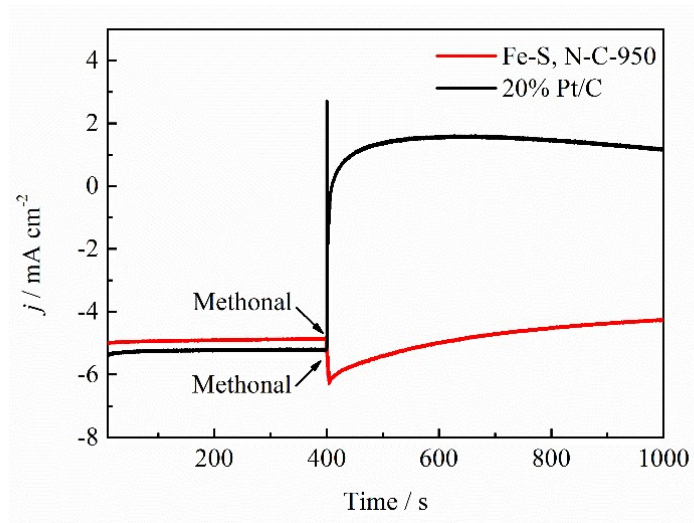

**Fig. S14** Methanol tolerance tests for Fe-S, N-C-950 and 20% Pt/C in 0.1 M KOH at 0.7 V.

**Table S1** Elemental composition of Fe-S, N-C-950 and Fe NPs/SNC calculated from XPS.

| Atomic % | Fe-S, N-C-950 | Fe NPs/SNC |
|----------|---------------|------------|
| C        | 92.75         | 90.01      |
| N        | 3.32          | 4.37       |
| O        | 3.19          | 3.94       |
| S        | 0.19          | 0.57       |
| Fe       | 0.55          | 1.11       |

**Table S2** The Comparison of ORR performance of non-precious M–N/C catalysts from the recent literature and this work

| Catalysts                                 | Electrolyte | Half-wave potential (V vs. RHE) | Reference                                           |
|-------------------------------------------|-------------|---------------------------------|-----------------------------------------------------|
| Fe-S, N-C-950                             | 0.1 M KOH   | 0.9                             | <b>This work</b>                                    |
| Fe-N/C-155                                | 0.1 M KOH   | 0.85                            | <i>J. Mater. Chem. A</i> , 2019, 7, 16508.          |
| Fe-N <sub>x</sub> -C                      | 0.1 M KOH   | 0.91                            | <i>Adv. Funct. Mater.</i> , 2019, 29, 1808872.      |
| C-FeZIF-8@g-C <sub>3</sub> N <sub>4</sub> | 0.1 M KOH   | 0.845                           | <i>Chem. Eng. J.</i> , 2020, 390, 124479.           |
| Fe-N-C/N-OMC                              | 0.1 M KOH   | 0.93                            | <i>Appl. Catal. B Environ.</i> , 2021, 280, 119411. |
| Fe-N-C HNSs                               | 0.1 M KOH   | 0.87                            | <i>Adv. Mater.</i> , 2018, 31, 1806312.             |
| Fe-SAC/NC                                 | 0.1 M KOH   | 0.84                            | <i>Nano Energy</i> , 2020, 72, 104670.              |
| Cu SAC                                    | 0.1 M KOH   | 0.81                            | <i>J. Mater. Chem. A</i> , 2019, 7, 16690.          |
| f-Mn-NC/CNT                               | 0.1 M KOH   | 0.83                            | <i>Nanoscale</i> , 2019, 11, 15900.                 |
| Co@hNCTs-800                              | 0.1 M KOH   | 0.887                           | <i>Nano Energy</i> , 2020, 71, 104592.              |
| Fe-N-S CNN                                | 0.1 M KOH   | 0.91                            | <i>Appl. Catal. B Environ.</i> , 2019, 250, 143.    |
| Fe-SAs/NSC                                | 0.1 M KOH   | 0.87                            | <i>J. Am. Chem.</i>                                 |

---

|           |           |      |                                            |
|-----------|-----------|------|--------------------------------------------|
|           |           |      | <i>Soc.</i> , 2019, 141,<br>20118.         |
| Fe-NSDC   | 0.1 M KOH | 0.84 | <i>Small</i> , 2019, 15,<br>1900307.       |
| Fe-S, N-C | 0.1 M KOH | 0.83 | <i>Electrocatalysis</i> ,<br>2019, 10, 72. |

---
